# Supplementary material for: Maternal cardiovascular and endothelial function from first trimester to postpartum
Source: PLOS journal article supplement (doi:10.1371/journal.pone.0197748), 2018-05-21
Supplement: S2 (10.1371/journal.pone.0197748.s002) [file journal.pone.0197748.s002]

**S1 File. List of abbreviations.**

|                     |                                                                                           |
|---------------------|-------------------------------------------------------------------------------------------|
| sr                  | Sampling rate                                                                             |
| HR                  | Heart Rate                                                                                |
| RRI                 | R-R-Interval                                                                              |
| HRV                 | Heart rate variability                                                                    |
| SDNN                | Standard deviation of normal to normal beat interval                                      |
| RMSSD               | Square root of the mean squared differences of successive normal to normal beat intervals |
| LF                  | Low frequency spectral component of HRV (0.04-0.15 Hz)                                    |
| HF                  | High frequency spectral component of HRV (0.15-0.40 Hz)                                   |
| LF/HF-ratio         | Ratio between low and high frequency components (LF/HF ratio) of HRV spectra              |
| ln                  | natural logarithmic transformation                                                        |
| BP                  | Blood pressure                                                                            |
| SBP                 | Systolic blood pressure                                                                   |
| DBP                 | Diastolic blood pressure                                                                  |
| BRS                 | Baroreceptor reflex sensitivity                                                           |
| RF                  | Respiratory frequency                                                                     |
| PTT                 | Pulse transit time                                                                        |
| $Z_0$               | Thoracic impedance                                                                        |
| $\Delta Z_{0,Resp}$ | Change of thoracic impedance driven by respiration;                                       |
| Hb                  | Hemoglobin                                                                                |
| ET-1                | Endothelin 1                                                                              |
| ADMA                | Asymmetric dimethylarginine                                                               |
| SDMA                | Symmetric dimethylarginine                                                                |
